# Supplementary material
Source: PubMed Central journal article supplement (PMC5510680)

## Supplementary Data

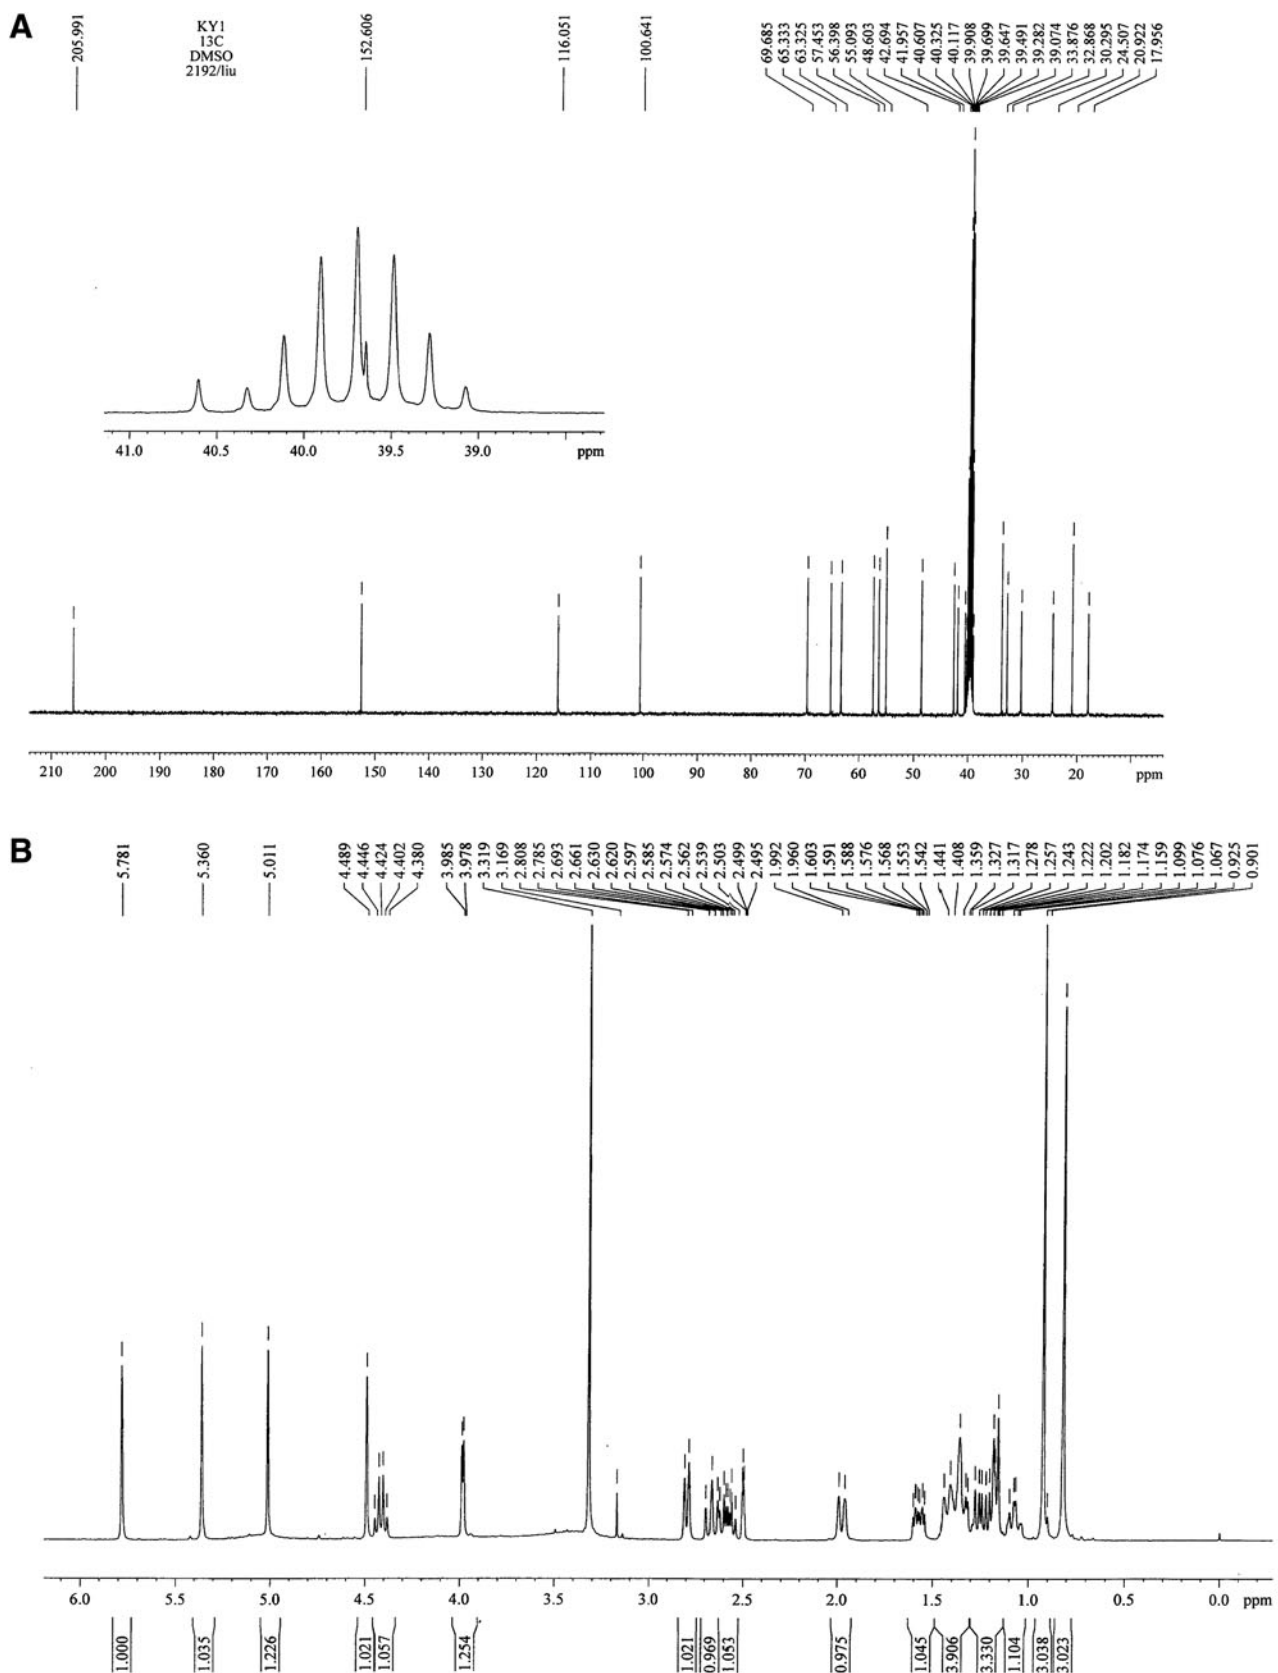

SUPPLEMENTARY FIG. S1. Representative <sup>13</sup>C-NMR (A) and <sup>1</sup>H-NMR (B) of JDA-202.

Supplement: Supp_Fig1.pdf [file Supp_Fig1.pdf]
